# Supplementary material for: Expression Profile of Laccase Gene Family in White-Rot Basidiomycete Lentinula edodes under Different Environmental Stresses
Source: PubMed Central journal article supplement (PMC6947313; doi:10.3390/genes10121045), 2019-12-16
Supplement: genes-10-01045-s001.pdf [file genes-10-01045-s001.pdf]

**Table 1.** factor binding sites predicted by Yeasttract.

| <b>Classification</b> | <b>Element Name</b> | <b>Signal Sequence</b> | <b>Putative Function</b>                                                                                                                                                 |
|-----------------------|---------------------|------------------------|--------------------------------------------------------------------------------------------------------------------------------------------------------------------------|
| Substrate utilization | Adr1p               | TTGGRG                 | Carbon source-responsive zinc-finger transcription factor                                                                                                                |
|                       | Azf1p               | AAGAAAA<br>A           | Zinc-finger transcription factor, involved in induction of CLN3 transcription in response to glucose                                                                     |
|                       | Cat8p               | NCCDTYN<br>VNCCGN      | active after diauxic shift, binds carbon source responsive elements                                                                                                      |
|                       | Cst6p               | GTGACGT                | Basic leucine zipper (bZIP) transcription factor of the ATF/CREB family involved in utilization of non-optimal carbon sources and chromosome stability                   |
|                       | Gat1p               | GATAAG                 | Transcriptional activator of genes involved in nitrogen catabolite repression;                                                                                           |
|                       | Gzf3p               | GATAAG                 | GATA zinc finger protein and Dal80p homolog that negatively regulates nitrogen catabolic gene expression; function requires a repressive carbon source                   |
|                       | Nrg1p               | CCCTC                  | Transcriptional repressor that recruits the Cyc8p-Tup1p complex to promoters; mediates glucose repression                                                                |
|                       | Rgt1p               | CGGANNA                | Glucose-responsive transcription factor that regulates expression of several glucose transporter (HXT) genes in response to glucose                                      |
| Heat shock            | Sip4p               | NCCDTYN<br>VNCCGN      | C6 zinc cluster transcriptional activator that binds to the carbon source-responsive element (CSRE) of gluconeogenic genes;                                              |
|                       | Hsf1p               | NGAANNT<br>TCN         | Trimeric heat shock transcription factor, activates multiple genes in response to stresses that include hyperthermia                                                     |
| Energy metabolism     | Skn7p               | GGCYGGC                | required for optimal induction of heat-shock genes in response to oxidative stress; involved in osmoregulation                                                           |
|                       | Gcr1p               | CTTCC                  | Transcriptional activator of genes involved in glycolysis; DNA-binding protein that interacts and functions with the transcriptional activator Gcr2p                     |
| Oxidative stress      | Gsm1p               | CGGNNNN<br>NNNNCG<br>G | Putative zinc cluster protein of unknown function; proposed to be involved in the regulation of energy metabolism, based on patterns of expression and sequence analysis |
|                       | Stb5p               | CGGNS                  | Transcription factor, involved in regulating multidrug resistance and oxidative stress response; forms a heterodimer with Pdr1p                                          |
|                       | Yap1p               | TGACTCA                | Basic leucine zipper (bZIP) transcription factor required for oxidative stress tolerance                                                                                 |

**Table 2.** used in this study.

| <b>Primer</b> | <b>Sequence (5'to 3')</b> | <b>Description</b>                         |
|---------------|---------------------------|--------------------------------------------|
| lcc1-QF       | GCAGGGTAGTCGCTATCGTTTT    | Detects the <i>Lelcc1</i> gene expression  |
| lcc1-QR       | TTATCAGCAGTTTGATTGACAGTG  |                                            |
| lcc2-QF       | CAGGCACCTTCTGGTATCATTCA   | Detects the <i>Lelcc2</i> gene expression  |
| lcc2-QR       | TCGGCAATAGTAAGCACGGTAGT   |                                            |
| lcc3-QF       | TCCCTGTTCTACAATCGGCACT    | Detects the <i>Lelcc3</i> gene expression  |
| lcc3-QR       | GTGTACGGATTTCGGCGAGTAA    |                                            |
| lcc4-QF       | TCAGGCTGGCAAGCGTTATAG     | Detects the <i>Lelcc4</i> gene expression  |
| lcc4-QR       | TGATTAGCGGTCAAAACAAAGGA   |                                            |
| lcc5-QF       | ACGACGACACCACCATTATC      | Detects the <i>Lelcc5</i> gene expression  |
| lcc5-QR       | CAGCCAAATCAGTGGCATTAC     |                                            |
| lcc6-QF       | TACCCTCACTGGGACCGTATGT    | Detects the <i>Lelcc6</i> gene expression  |
| lcc6-QR       | CGAAAGAGTGATGACCGTGGGA    |                                            |
| lcc7-QF       | TAGTATCCACTGGCACGGTCTTT   | Detects the <i>Lelcc7</i> gene expression  |
| lcc7-QR       | AGCCGTCGCAGTATTGAACC      |                                            |
| lcc8-QF       | TGGTATCGTCCCAGTTTCGG      | Detects the <i>Lelcc8</i> gene expression  |
| lcc8-QR       | AGTCATTGGAGTGGTCGGAGTT    |                                            |
| lcc9-QF       | GCATCCCTTCCACCTCCAT       | Detects the <i>Lelcc9</i> gene expression  |
| lcc9-QR       | CGGGCACAACCTCAGTCCAG      |                                            |
| lcc10-QF      | TTGGTTTCAACGAGAACTCTACGC  | Detects the <i>Lelcc10</i> gene expression |
| lcc10-QR      | AATCGGATATTCTTCGGTGTCTGTA |                                            |
| lcc11-QF      | ACAGTGCTTACGGTCAATGGTCT   | Detects the <i>Lelcc11</i> gene expression |
| lcc11-QR      | GTGCCAATGTAAACTGGTAGCCT   |                                            |
| lcc12-QF      | TGGATTGCGTGGAGCCTTTG      | Detects the <i>Lelcc12</i> gene expression |
| lcc12-QR      | TCGGGACAGTACCGCTTTGG      |                                            |
| lcc13-QF      | ATCCGACCAGGAACCTGAACCA    | Detects the <i>Lelcc13</i> gene expression |
| lcc13-QR      | GCAGTAACCACGAGATTGAGGG    |                                            |
| lcc14-QF      | AACACTGAGAATCCCATAAAGCG   | Detects the <i>Lelcc14</i> gene expression |
| lcc14-QR      | GCCATCACAGTAGCGAGACCAG    |                                            |
| phrA-F        | CACTTCCTCGACTGGAATTAGG    | Detects the <i>LephrA</i> gene expression  |
| phrA-R        | GTA CTG CCAACTCGATTCTCTAC |                                            |
| phrB-F        | CTGAAGACGGGCATAAGAAGAA    | Detects the <i>LephrA</i> gene expression  |
| phrB-R        | GTAGTCCACAAGCGTTACAGAG    |                                            |
| tyr1-F        | TGGTTTGTCCATTTCGGTAGAGC   | Detects the <i>Letyr1</i> gene expression  |
| tyr1-R        | AGTGGATGATAAGAGGGGTAGGC   |                                            |
| Actin-F       | GGAGAAGATTTGGCATCACACA    | Detects the <i>Leactin</i> gene expression |
| Actin-R       | GAAGAGCGAAACCCTCGTAGA     |                                            |

**Table 3.** *gene (Lelcc)* members identified in the genome of *L. edodes* monokaryotic strain W1-26.

| <b>Gene name</b> | <b>Locus name</b> | <b>Location</b>                | <b>Introns</b> | <b>Group</b> | <b>SP</b> | <b>Size(aa)</b> | <b>MW(Da)</b> | <b>PI</b> |
|------------------|-------------------|--------------------------------|----------------|--------------|-----------|-----------------|---------------|-----------|
| Lelcc1           | LE01Gene08330     | LE01Scaffold0049:34167-39465   | 24             | 1-A          | Y         | 537             | 57526.37      | 4.57      |
| Lelcc2           | LE01Gene07443     | LE01Scaffold0040:103186-106086 | 13             | 1-B          | Y         | 533             | 57880.26      | 4.94      |
| Lelcc3           | LE01Gene07056     | LE01Scaffold0036:220857-224325 | 15             | 1-B          | N         | 708             | 78630.47      | 6.76      |
| Lelcc4           | LE01Gene04008     | LE01Scaffold0014:408733-412091 | 16             | 1-B          | Y         | 527             | 57099.02      | 5.37      |
| Lelcc5           | LE01Gene01372     | LE01Scaffold0004:121357-125473 | 18             | 1-A          | Y         | 554             | 59531.51      | 4.3       |
| Lelcc6           | LE01Gene13044     | LE01Scaffold0127:1869-5175     | 26             | 1-A          | Y         | 532             | 56891.49      | 5.36      |
| Lelcc7           | LE01Gene07758     | LE01Scaffold0043:97003-100271  | 12             | 1-B          | Y         | 560             | 61029.93      | 5.69      |
| Lelcc8           | LE01Gene01361     | LE01Scaffold0004:91720-95445   | 23             | 2            | Y         | 528             | 57097.05      | 4.56      |
| Lelcc9           | LE01Gene04648     | LE01Scaffold0018:221426-227240 | 15             | 2            | Y         | 524             | 56798.59      | 4.32      |
| Lelcc10          | LE01Gene05032     | LE01Scaffold0020:315527-318125 | 9              | F            | Y         | 631             | 68273.61      | 4.6       |
| Lelcc11          | LE01Gene06108     | LE01Scaffold0028:269081-271435 | 9              | F            | N         | 597             | 66893.97      | 7.14      |
| Lelcc12          | LE01Gene08149     | LE01Scaffold0047:72666-75950   | 19             | 2            | Y         | 523             | 57242.03      | 4.66      |
| Lelcc13          | LE01Gene04737     | LE01Scaffold0018:454217-456795 | 15             | 2            | Y         | 524             | 56738.83      | 4.75      |
| Lelcc14          | LE01Gene04660     | LE01Scaffold0018:260417-264015 | 14             | 2            | Y         | 524             | 56760.71      | 4.46      |

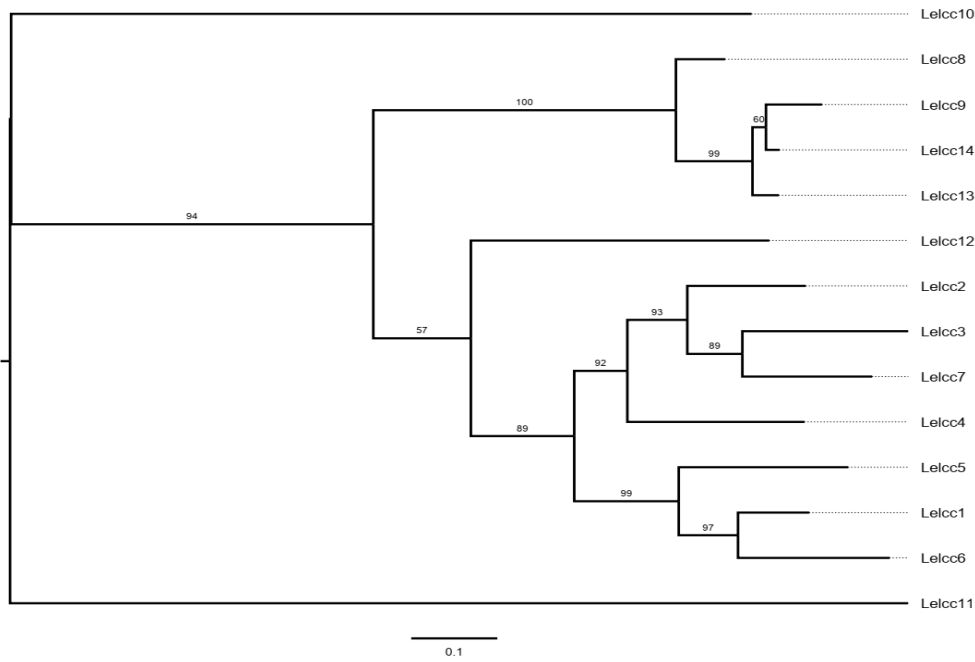

**Figure 1.** Phylogenetic analysis of laccases in *Lentinula edodes* (*Lelcc*). The phylogram was constructed using the neighbor-joining method. The scale bar indicates a distance of 0.07, and the numbers on branches indicate percentage bootstrap support values (based on 1000 replications).

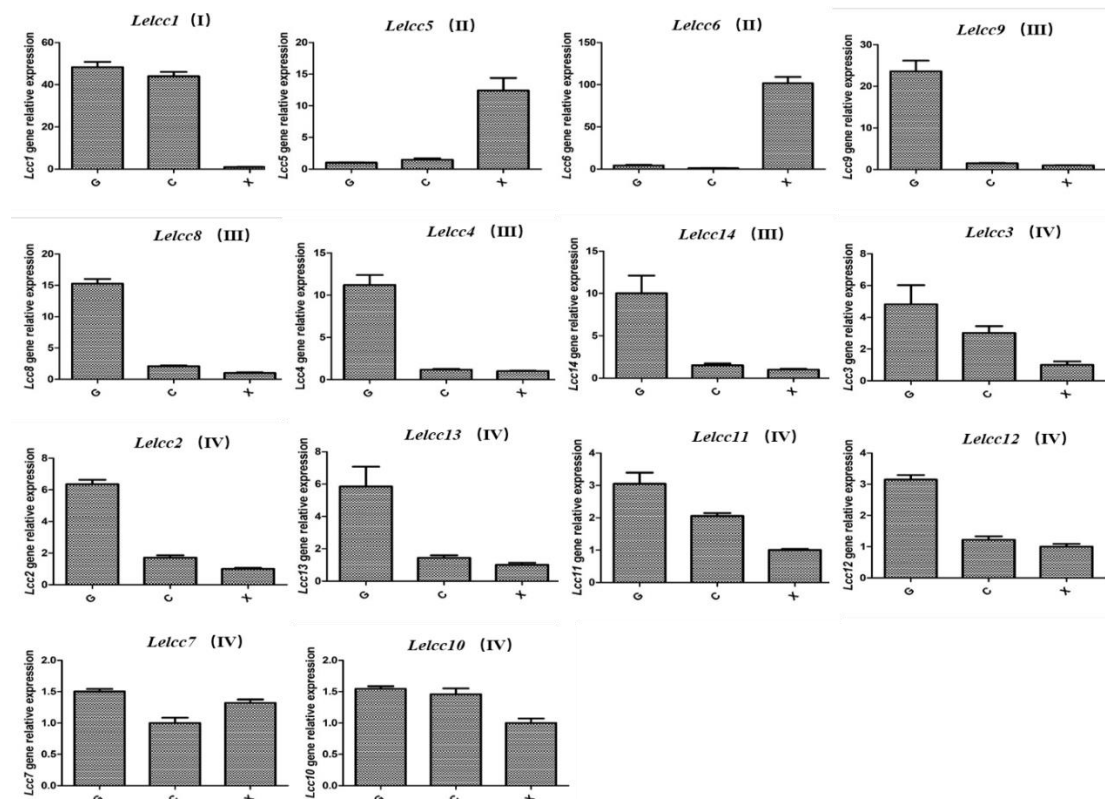

**Figure 2.** Expression profiles of laccase genes from *L. edodes* (*Lelcc*) in various carbon sources. Results are presented as mean  $\pm$  standard deviation (SD).

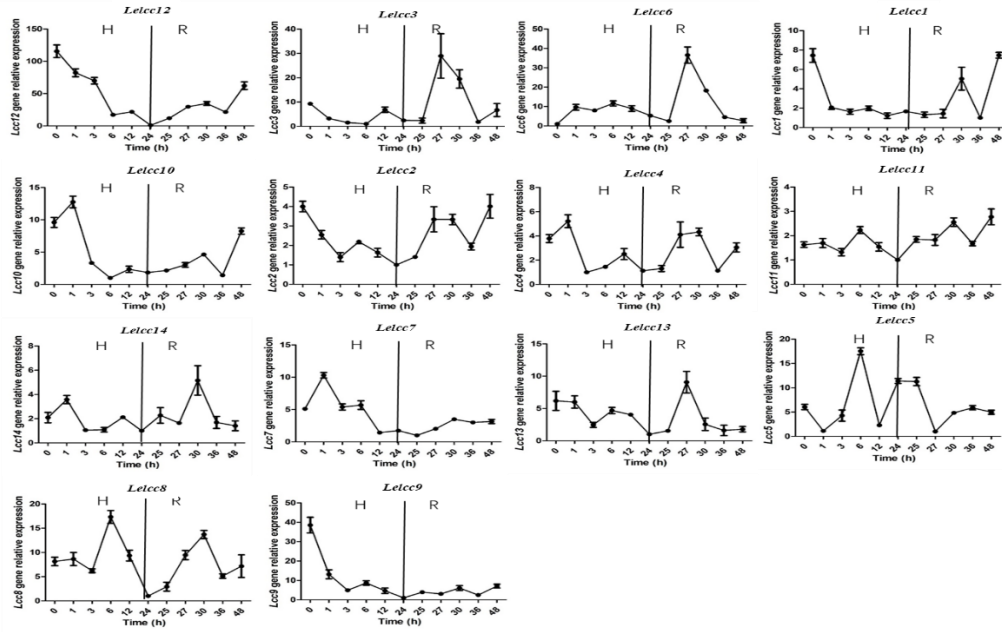

**Figure 3.** Expression profiles of laccase genes from *L. edodes* (*Lelcc*) in heat stress. H: 39°C high temperature stress treatment phase; R: 25°C recovery phase. Results are presented as mean  $\pm$  standard deviation (SD).

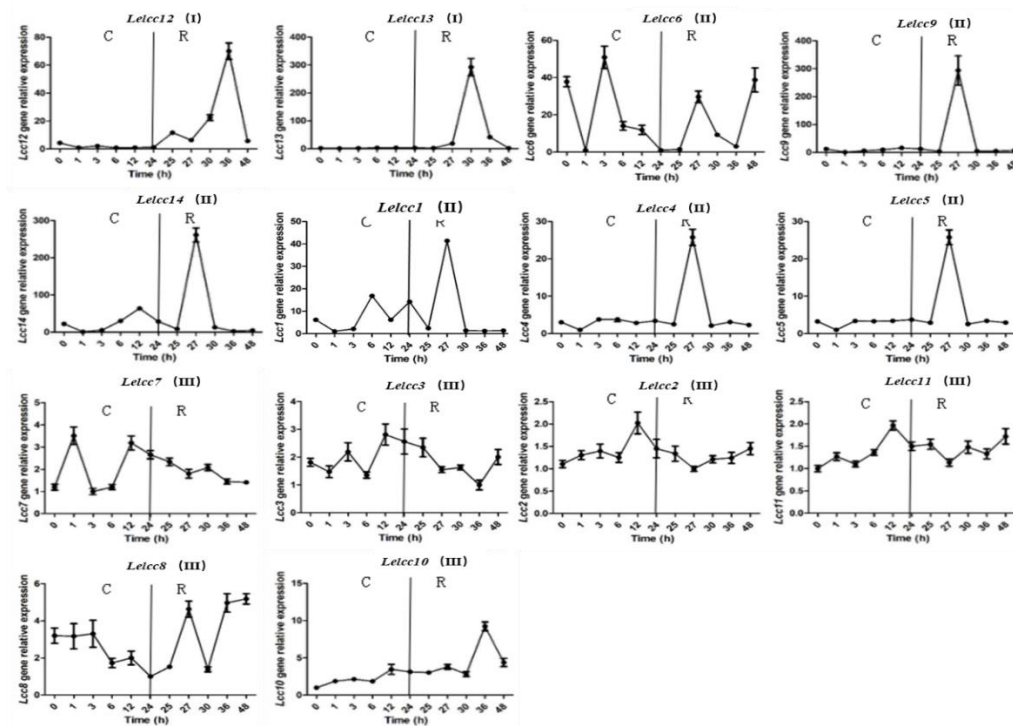

**Figure 4.** Expression profiles of laccase genes from *L. edodes* (*Lelcc*) in low-temperature stress. C: 10°C low-temperature stress treatment phase; R: 25°C recovery phase. Results are presented as mean  $\pm$  standard deviation (SD).

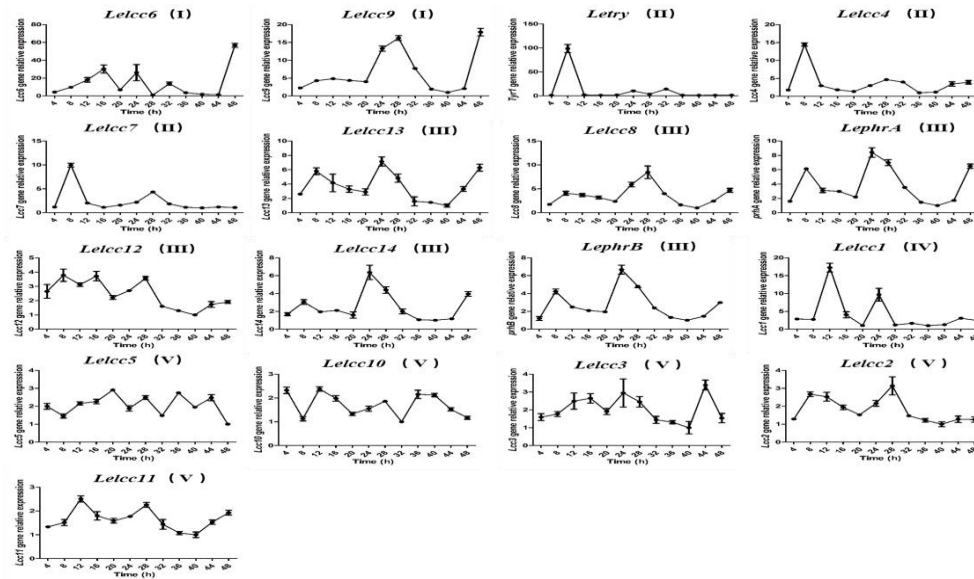

**Figure 5.** Expression profiles of laccase genes from *L. edodes* (*Lelcc*) genes in photoperiod (12h light/12h dark). L: light; D: dark. Results are presented as mean  $\pm$  standard deviation (SD).

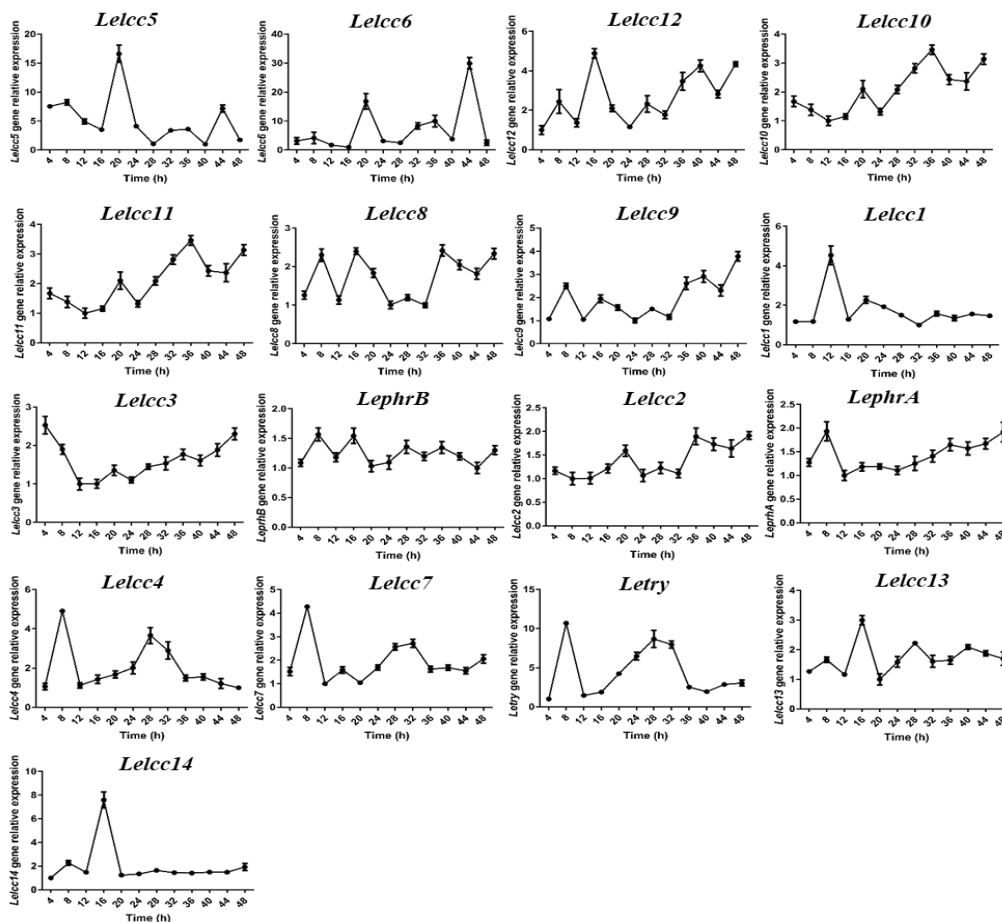

**Figure 6.** Expression profiles of laccase genes from *L. edodes* (*Lelcc*) in photoperiod (24h light/0h dark). Results are presented as mean  $\pm$  standard deviation (SD).

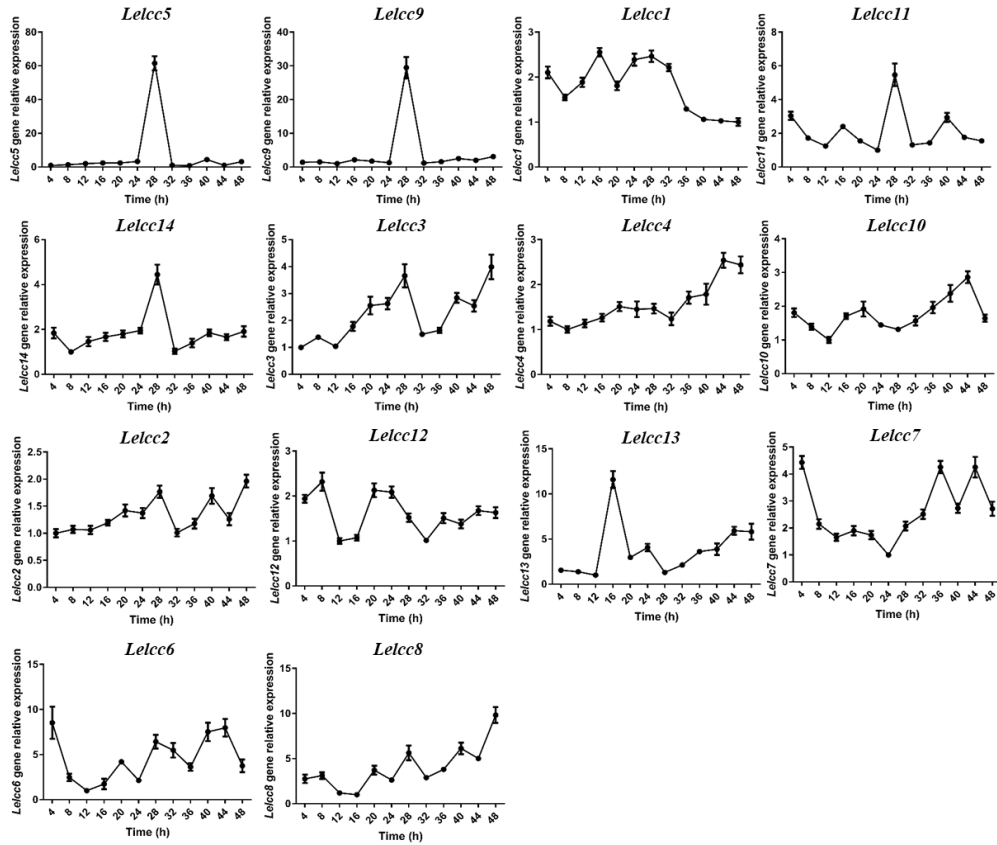

**Figure 7.** Expression profiles of laccase genes from *L. edodes* (*Lelcc*) in photoperiod (0h light/24h dark). Results are presented as mean  $\pm$  standard deviation (SD).
